# Supplementary material for: Effects of Phosphorus on Nitrification Process in a Fertile Soil Amended with Urea
Source: MDPI journal article supplement (doi:10.3390/agriculture11060523), 2021-06-04
Supplement: s1 [file s1]

**Table S1.** Results of Fisher's Least Significant Difference (LSD) test of pH in the different treatments at the same sampling period (0-10d).

| Treatments      | Incubation time (days) |                   |               |                   |               |                   |               |
|-----------------|------------------------|-------------------|---------------|-------------------|---------------|-------------------|---------------|
|                 | 0                      | 1                 | 2             | 3                 | 5             | 7                 | 10            |
| C vs. P         | <b>0.0007</b>          | <b>&lt;0.0001</b> | <b>0.0002</b> | <b>&lt;0.0001</b> | <b>0.0015</b> | <b>&lt;0.0001</b> | <b>0.0002</b> |
| Urea vs. Urea+P | 0.1101                 | 0.4283            | 0.6426        | 0.8543            | 0.5247        | 0.5730            | 0.7371        |

The data in Fig1A were used for the statistical analysis. *P* values of Fisher's LSD tests ( $P \leq 0.05$ ) were reported. Numbers in bold indicate a statistical difference between the control (C) and the phosphorus (P) treatments, the urea and the combined application of urea and phosphorus (Urea+P) treatments at the same sampling period. C, no urea and P addition; Urea, urea amendment rate at 0.20 g N kg<sup>-1</sup> soil; P, monopotassium phosphate amendment rate at 0.087 g P kg<sup>-1</sup> soil.

**Table S2.** Results of Fisher's Least Significant Difference (LSD) test of available P in the different treatments at the same sampling period (0-10d).

| Treatments      | Incubation time (days) |                   |               |                   |               |               |                   |
|-----------------|------------------------|-------------------|---------------|-------------------|---------------|---------------|-------------------|
|                 | 0                      | 1                 | 2             | 3                 | 5             | 7             | 10                |
| C vs. P         | <b>0.0010</b>          | <b>0.0002</b>     | <b>0.0013</b> | <b>0.0001</b>     | <b>0.0002</b> | <b>0.0008</b> | <b>&lt;0.0001</b> |
| Urea vs. Urea+P | <b>0.0005</b>          | <b>&lt;0.0001</b> | <b>0.0006</b> | <b>&lt;0.0001</b> | <b>0.0011</b> | <b>0.0003</b> | <b>0.0095</b>     |

The data in Fig. 1B were used for the statistical analysis. *P* values of Fisher's LSD tests ( $P \leq 0.05$ ) were reported. Numbers in bold indicate a statistical difference between the control (C) and the phosphorus (P) treatments, the urea and the combined application of urea and phosphorus (Urea+P) treatments at the same sampling period. C, no urea and P addition; Urea, urea amendment rate at 0.20 g N kg<sup>-1</sup> soil; P, monopotassium phosphate amendment rate at 0.087 g P kg<sup>-1</sup> soil.

**Table S3.** Results of Fisher's Least Significant Difference (LSD) test of  $\text{NH}_4^+\text{-N}$  in the different treatments at the same sampling period (0-10d).

| Treatments      | Incubation time (days) |               |               |               |               |               |        |
|-----------------|------------------------|---------------|---------------|---------------|---------------|---------------|--------|
|                 | 0                      | 1             | 2             | 3             | 5             | 7             | 10     |
| C vs. P         | 0.0873                 | 0.3038        | <b>0.0046</b> | <b>0.0007</b> | 0.0591        | <b>0.0168</b> | 0.9551 |
| Urea vs. Urea+P | 0.9758                 | <b>0.0147</b> | <b>0.0061</b> | 0.6615        | <b>0.0054</b> | <b>0.0328</b> | 0.2733 |

The data in Fig. 2A were used for the statistical analysis. *P* values of Fisher's LSD tests ( $P \leq 0.05$ ) were reported. Numbers in bold indicate a statistical difference between the control (C) and the phosphorus (P) treatments, the urea and the combined application of urea and phosphorus (Urea+P) treatments at the same sampling period. C, no N and P addition; Urea, urea amendment rate at 0.20 g N kg<sup>-1</sup> soil; P, monopotassium phosphate amendment rate at 0.087 g P kg<sup>-1</sup> soil.

**Table S4.** Results of Fisher's Least Significant Difference (LSD) test of  $\text{NO}_3^-\text{-N}$  in the different treatments at the same sampling period (0-10d).

| Treatments      | Incubation time (days) |               |               |               |               |               |        |
|-----------------|------------------------|---------------|---------------|---------------|---------------|---------------|--------|
|                 | 0                      | 1             | 2             | 3             | 5             | 7             | 10     |
| C vs. P         | 0.7196                 | 0.2616        | 0.2475        | <b>0.0224</b> | 0.1130        | <b>0.0038</b> | 0.2020 |
| Urea vs. Urea+P | <b>0.0404</b>          | <b>0.0411</b> | <b>0.0005</b> | <b>0.0009</b> | <b>0.0004</b> | 0.8460        | 0.4644 |

The data in Fig. 2B were used for the statistical analysis. *P* values of Fisher's LSD tests ( $P \leq 0.05$ ) were reported. Numbers in bold indicate a statistical difference between the control (C) and the phosphorus (P) treatments, the urea and the combined application of urea and phosphorus (Urea+P) treatments at the same sampling period. C, no N and P addition; Urea, urea amendment rate at 0.20 g N kg<sup>-1</sup> soil; P, monopotassium phosphate amendment rate at 0.087 g P kg<sup>-1</sup> soil.

**Table S5.** Results of Fisher's Least Significant Difference (LSD) test of net nitrification rate in the different treatments at the same sampling period (0-10d).

| Treatments      | Incubation time (days) |               |               |               |               |        |
|-----------------|------------------------|---------------|---------------|---------------|---------------|--------|
|                 | 1                      | 2             | 3             | 5             | 7             | 10     |
| C vs. P         | 0.4495                 | 0.3430        | <b>0.0176</b> | 0.0966        | <b>0.0047</b> | 0.1838 |
| Urea vs. Urea+P | 0.3308                 | <b>0.0010</b> | <b>0.0012</b> | <b>0.0006</b> | 0.9084        | 0.7023 |

The data in Table 1 were used for the statistical analysis. *P* values of Fisher's LSD tests ( $P \leq 0.05$ ) were reported. Numbers in bold indicate a statistical difference between the control (C) and the phosphorus (P) treatments, the urea and the combined application of urea and phosphorus (Urea+P) treatments at the same sampling period. C, no N and P addition; Urea, urea amendment rate at 0.20 g N kg<sup>-1</sup> soil; P, monopotassium phosphate amendment rate at 0.087 g P kg<sup>-1</sup> soil.

**Table S6.** Results of Fisher's Least Significant Difference (LSD) test of ratio of NH<sub>4</sub><sup>+</sup>-N/AP in the different treatments at the same sampling period (0-10d).

| Treatments      | Incubation time (days) |               |               |                   |               |               |        |
|-----------------|------------------------|---------------|---------------|-------------------|---------------|---------------|--------|
|                 | 0                      | 1             | 2             | 3                 | 5             | 7             | 10     |
| C vs. P         | <b>0.0056</b>          | <b>0.0006</b> | <b>0.0437</b> | <b>0.0132</b>     | 0.7953        | <b>0.0006</b> | 0.2746 |
| Urea vs. Urea+P | <b>0.0242</b>          | <b>0.0021</b> | <b>0.0011</b> | <b>&lt;0.0001</b> | <b>0.0104</b> | 0.1042        | 0.4079 |

The data in Fig. 1B and 2A were used for the statistical analysis. *P* values of Fisher's LSD tests ( $P \leq 0.05$ ) were reported. Numbers in bold indicate a statistical difference between the control (C) and the phosphorus (P) treatments, the urea and the combined application of urea and phosphorus (Urea+P) treatments at the same sampling period. C, no N and P addition; Urea, urea amendment rate at 0.20 g N kg<sup>-1</sup> soil; P, monopotassium phosphate amendment rate at 0.087 g P kg<sup>-1</sup> soil. AP, available phosphorus.

**Table S7.** Results of Fisher's Least Significant Difference (LSD) test of ratio of  $\text{NO}_3^-$ -N/AP in the different treatments at the same sampling period (0-10d).

| Treatments      | Incubation time (days) |                   |               |               |               |               |               |
|-----------------|------------------------|-------------------|---------------|---------------|---------------|---------------|---------------|
|                 | 0                      | 1                 | 2             | 3             | 5             | 7             | 10            |
| C vs. P         | <b>0.0037</b>          | <b>&lt;0.0001</b> | <b>0.0054</b> | <b>0.0045</b> | <b>0.0126</b> | <b>0.0005</b> | <b>0.0035</b> |
| Urea vs. Urea+P | <b>0.0005</b>          | <b>&lt;0.0001</b> | <b>0.0001</b> | <b>0.0003</b> | <b>0.0022</b> | <b>0.0046</b> | <b>0.0059</b> |

The data in Fig. 1B and 2B were used for the statistical analysis. *P* values of Fisher's LSD tests ( $P \leq 0.05$ ) were reported. Numbers in bold indicate a statistical difference between the control (C) and the phosphorus (P) treatments, the urea and the combined application of urea and phosphorus (Urea+P) treatments at the same sampling period. C, no N and P addition; Urea, urea amendment rate at 0.20 g N kg<sup>-1</sup> soil; P, monopotassium phosphate amendment rate at 0.087 g P kg<sup>-1</sup> soil. AP, available phosphorus.

**Table S8.** Results of Fisher's Least Significant Difference (LSD) test of *amoA* gene abundance of AOB, AOA and ratio of AOB to AOA between in the different treatments at the same sampling period (0, 3 and 7d).

| Treatments      | Incubation time (days) |                   |               | AOB           |               |        | AOA           |               |               | AOB/AOA |   |   |
|-----------------|------------------------|-------------------|---------------|---------------|---------------|--------|---------------|---------------|---------------|---------|---|---|
|                 | 0                      | 3                 | 7             | 0             | 3             | 7      | 0             | 3             | 7             | 0       | 3 | 7 |
| C vs. P         | <b>0.0350</b>          | <b>0.0055</b>     | <b>0.0013</b> | 0.1802        | <b>0.0428</b> | 0.1844 | 0.1812        | 0.3694        | <b>0.0020</b> |         |   |   |
| Urea vs. Urea+P | <b>0.0024</b>          | <b>&lt;0.0001</b> | 0.3133        | <b>0.0059</b> | <b>0.0003</b> | 0.7620 | <b>0.0366</b> | <b>0.0014</b> | 0.5773        |         |   |   |

The data in Fig. 3 were used for the statistical analysis. *P* values of Fisher's LSD tests ( $P \leq 0.05$ ) were reported. Numbers in bold indicate a statistical difference between the control (C) and the phosphorus (P) treatments, the urea and the combined application of urea and phosphorus (Urea+P) treatments at the same sampling period. C, no N and P addition; Urea, urea amendment rate at 0.20 g N kg<sup>-1</sup> soil; P, monopotassium phosphate amendment rate at 0.087 g P kg<sup>-1</sup> soil. AOB, ammonia oxidizing bacteria; AOA, ammonia oxidizing archaea.
