# Supplementary material for: Effects of Phosphorus on Nitrification Process in a Fertile Soil Amended with Urea
Source: MDPI journal article supplement (doi:10.3390/agriculture11060523), 2021-06-04
Supplement: s1 [file s1]

Archive with 1 entries (1 files):
- agriculture-1218577-supplementary.pdf
